# Supplementary material for: Clinical and Epidemiologic Characteristics of Spreaders of Middle East Respiratory Syndrome Coronavirus during the 2015 Outbreak in Korea
Source: PubMed Central journal article supplement — J Korean Med Sci. 2017 Mar 17;32(5):744–9. doi: 10.3346/jkms.2017.32.5.744 (PMC5383605; doi:10.3346/jkms.2017.32.5.744), 2017-03-17
Supplement: jkms-32-744-s001.pdf [file jkms-32-744-s001.pdf]

**Supplementary Table 1.** Comparison of epidemiologic characteristics before and after June 7, 2015, when more strict infection control measures were implemented by the government

| Epidemiologic characteristics                      | Sx onset before June 7 (n = 130) | Sx onset after June 7 (n = 51) | OR (95% CI)      | P value |
|----------------------------------------------------|----------------------------------|--------------------------------|------------------|---------|
| Sx onset to isolation, day, median (IQR)           | 3.0 (1.0–7.0)                    | 2.0 (0.0–4.0)                  | 0.85 (0.76–0.95) | 0.003   |
| Nonisolated in-hospital days, median (IQR)         | 1.0 (0.0–3.0)                    | 0.0 (0.0–1.0)                  | 0.59 (0.44–0.80) | 0.001   |
| Nonisolated in-hospital days $\geq$ 2 day, No. (%) | 59 (45.4)                        | 6 (11.8)                       | 0.16 (0.06–0.40) | < 0.001 |
| Sx onset to diagnosis, day, mean ( $\pm$ SD)       | 7.5 ( $\pm$ 3.8)                 | 4.6 ( $\pm$ 2.9)               | 0.76 (0.67–0.86) | < 0.001 |

Sx = symptom, OR = odds ratio, CI = confidence interval, IQR = interquartile range, SD = standard deviation.
