# Supplementary material for: Clinical and Epidemiologic Characteristics of Spreaders of Middle East Respiratory Syndrome Coronavirus during the 2015 Outbreak in Korea
Source: PubMed Central journal article supplement — J Korean Med Sci. 2017 Mar 17;32(5):744–9. doi: 10.3346/jkms.2017.32.5.744 (PMC5383605; doi:10.3346/jkms.2017.32.5.744), 2017-03-17
Supplement: jkms-32-744-s002.pdf [file jkms-32-744-s002.pdf]

**Supplementary Table 2.** Comparison of clinical features and epidemiologic characteristics between the non-spreaders and the spreaders during the 2015 Korean outbreak of MERS-CoV, after censoring patients who had developed symptoms later than June 7 or unknown symptom onset (n = 56)

| Patient and epidemiologic characteristics                            | Non-spreader (n = 118) | Spreader (n = 12) | P value |
|----------------------------------------------------------------------|------------------------|-------------------|---------|
| <b>Patient characteristics</b>                                       |                        |                   |         |
| Age, mean (± SD)                                                     | 55.5 (± 15.2)          | 53.8 (± 18.8)     | 0.708   |
| Male                                                                 | 67 (56.8)              | 9 (75.0)          | 0.233   |
| <b>Underlying diseases</b>                                           |                        |                   |         |
| DM                                                                   | 23 (19.5)              | 1 (8.3)           | 0.360   |
| Hypertension                                                         | 38 (32.2)              | 3 (25.0)          | 0.610   |
| Chronic kidney diseases                                              | 4 (3.4)                | 1 (8.3)           | 0.413   |
| Chronic heart diseases                                               | 11 (9.3)               | 0 (0.0)           | 0.999   |
| Chronic lung diseases                                                | 13 (11.0)              | 2 (16.7)          | 0.563   |
| Chronic liver diseases                                               | 6 (5.1)                | 1 (8.3)           | 0.638   |
| <b>Clinical characteristics at presentation</b>                      |                        |                   |         |
| <b>Signs and symptoms*</b>                                           |                        |                   |         |
| Fever (≥ 38.5°C)                                                     | 16 (13.8)              | 5 (41.7)          | 0.020   |
| Systolic BP ≤ 90 mmHg                                                | 7 (6.0)                | 1 (8.3)           | 0.755   |
| Diastolic BP ≤ 60 mmHg                                               | 20 (17.2)              | 3 (25.0)          | 0.508   |
| Respiratory rate > 24/min                                            | 14 (12.1)              | 4 (33.3)          | 0.056   |
| Cough                                                                | 64 (55.2)              | 10 (83.3)         | 0.079   |
| Sputum                                                               | 42 (36.2)              | 8 (66.7)          | 0.050   |
| Dyspnea                                                              | 27 (23.3)              | 8 (66.7)          | 0.004   |
| Myalgia                                                              | 51 (43.6)              | 7 (58.3)          | 0.333   |
| Headache                                                             | 26 (22.2)              | 2 (16.7)          | 0.658   |
| Diarrhea                                                             | 24 (20.5)              | 3 (25.0)          | 0.717   |
| <b>Laboratory tests</b>                                              |                        |                   |         |
| WBC > 10,000/μL or < 4,000/μL <sup>†</sup>                           | 57 (52.8)              | 7 (58.3)          | 0.715   |
| Platelet < 100,000 /μL <sup>†</sup>                                  | 21 (19.4)              | 4 (33.3)          | 0.269   |
| CRP ≥ 3.0 mg/dL <sup>‡</sup>                                         | 50 (50.5)              | 9 (81.8)          | 0.066   |
| BUN > 20 mg/dL <sup>§</sup>                                          | 16 (15.5)              | 2 (16.7)          | 0.919   |
| Creatinine > 1.5 mg/dL <sup>§</sup>                                  | 5 (4.9)                | 1 (8.3)           | 0.613   |
| CXR abnormality in more than 3 lung zones <sup>  </sup>              | 12 (10.7)              | 5 (41.7)          | 0.007   |
| Symptom onset to negative conversion, day, median (IQR) <sup>¶</sup> | 18.0 (15.5–21.5)       | 28.5 (20.0–35.0)  | 0.002   |
| <b>Clinical outcomes</b>                                             |                        |                   |         |
| Mechanical ventilation*                                              | 26 (22.4)              | 6 (50.0)          | 0.045   |
| Days from symptom onset to mechanical ventilation, median (IQR)*     | 10.0 (7.8–12.0)        | 9.0 (6.5–11.5)    | 0.672   |
| Mortality                                                            | 26 (22.0)              | 4 (33.3)          | 0.381   |
| Days from symptom onset to death, median (IQR)                       | 14.5 (11.5–21.0)       | 7.0 (2.8–9.0)     | 0.050   |
| <b>Epidemiologic characteristics</b>                                 |                        |                   |         |
| <b>Phase in chain of transmission</b>                                |                        |                   |         |
| Primary                                                              | 0 (0.0)                | 1 (9.1)           | 0.007   |
| Secondary                                                            | 25 (21.2)              | 5 (45.5)          |         |
| Tertiary                                                             | 92 (78.0)              | 5 (45.5)          |         |
| Quaternary                                                           | 1 (0.8)                | 0 (0.0)           |         |
| Median incubation period, day, mean (± SD)**                         | 5.9 (± 3.3)            | 7.1 (± 3.6)       | 0.263   |
| Symptom onset to isolation, day, mean (± SD)                         | 4.2 (± 4.1)            | 6.0 (± 3.2)       | 0.138   |
| Nonisolated in-hospital days, median (IQR)                           | 1.0 (0.0–2.3)          | 5.0 (2.0–8.5)     | 0.001   |
| Nonisolated in-hospital days ≥ 2 day                                 | 49 (41.5)              | 10 (83.3)         | 0.014   |
| Symptom onset to diagnosis, day, mean (± SD)                         | 7.4 (± 3.9)            | 8.5 (± 2.9)       | 0.330   |

Data shown are number (%) not otherwise specified.

MERS-CoV = Middle East Respiratory Syndrome Coronavirus, SD = standard deviation, DM = diabetes mellitus, BP = blood pressure, WBC = white blood cell, CRP = C-reactive protein, BUN = blood urea nitrogen, CXR = chest X-ray, IQR = interquartile range.

\*Data were unavailable in 2 cases (1.5%); †Data were unavailable in 10 cases (7.7%); ‡Data were unavailable in 20 cases (15.4%); §Data were unavailable in 15 cases (11.5%);

||Data were unavailable in 6 cases (4.6%); ¶Data were unavailable in 33 cases (25.4%); \*\*Data were unavailable in one case (0.8%).
