# Supplementary material for: Clinical and Epidemiologic Characteristics of Spreaders of Middle East Respiratory Syndrome Coronavirus during the 2015 Outbreak in Korea
Source: PubMed Central journal article supplement — J Korean Med Sci. 2017 Mar 17;32(5):744–9. doi: 10.3346/jkms.2017.32.5.744 (PMC5383605; doi:10.3346/jkms.2017.32.5.744), 2017-03-17
Supplement: jkms-32-744-s003.pdf [file jkms-32-744-s003.pdf]

**Supplementary Table 3.** Forward stepwise multivariate analysis for risk factors for spreader of MERS-CoV, after censoring patients who had developed their symptom later than June 7

| Variables                                  | Non-spreader (n = 118) | Spreader (n = 12) | aOR (95% CI)      | P value |
|--------------------------------------------|------------------------|-------------------|-------------------|---------|
| Dyspnea, No. (%)                           | 27 (23.3)              | 8 (66.7)          | 4.38 (1.13–16.90) | 0.032   |
| Nonisolated in-hospital days, median (IQR) | 1.0 (0.0–2.3)          | 5.0 (2.0–8.5)     | 1.31 (1.07–1.60)  | 0.009   |

MERS-CoV = Middle East Respiratory Syndrome Coronavirus, aOR = adjusted odds ratio, CI = confidence interval, IQR = interquartile range.
