# Supplementary material for: Clinical and Epidemiologic Characteristics of Spreaders of Middle East Respiratory Syndrome Coronavirus during the 2015 Outbreak in Korea
Source: PubMed Central journal article supplement — J Korean Med Sci. 2017 Mar 17;32(5):744–9. doi: 10.3346/jkms.2017.32.5.744 (PMC5383605; doi:10.3346/jkms.2017.32.5.744), 2017-03-17
Supplement: jkms-32-744-s005.pdf [file jkms-32-744-s005.pdf]

**Supplementary Table 5.** Forward stepwise multivariate analysis for risk factors for spreader of MERS-CoV, after censoring healthcare workers

| Variables                                          | Non-spreader (n = 135) | Spreader (n = 12) | aOR (95% CI)      | P value |
|----------------------------------------------------|------------------------|-------------------|-------------------|---------|
| CXR abnormality in more than 3 lung zones, No. (%) | 16 (12.4)              | 6 (50.0)          | 4.97 (1.28–19.35) | 0.021   |
| Nonisolated in-hospital days, median (IQR)         | 1.0 (0.0–2.0)          | 4.0 (1.3–6.8)     | 5.63 (1.10–28.75) | 0.038   |

MERS-CoV = Middle East Respiratory Syndrome Coronavirus, aOR = adjusted odds ratio, CI = confidence interval, CXR = chest X-ray, IQR = interquartile range.
